# Supplementary material for: Zebrafish Paralogs brd2a and brd2b Are Needed for Proper Circulatory, Excretory and Central Nervous System Formation and Act as Genetic Antagonists during Development
Source: MDPI journal article supplement (doi:10.3390/jdb9040046), 2021-10-31

## SUPPLEMENTARY FIGURES

### S1. Anti-Brd2b peptide antibody detects major protein products in zebrafish embryos and oocytes\_ Western blot repeat of total ovary (ov) and staged embryos (4h, 24h, 48h) showing product between 50 and 75 kD in 24 and 48 hpf embryos, and faintly also in 4 hpf embryos.

A product over 150 kD is consistently detected in ovaries (ov) and 48 hpf embryos (shown here and in Figure 2) and sometimes faintly in 4 hpf and 24 hpf embryos (shown in Figure 2); a product between 50 and 75 kD is also consistently detected in 48 hpf embryos (shown here and in Figure 2) and sometimes also in 4 hpf and 24 hpf embryos (shown here).

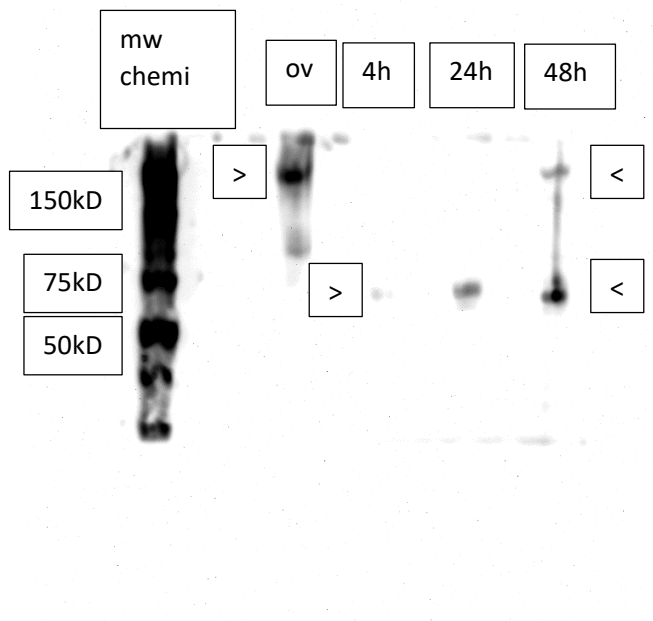

**S2. Brd2b knockdown results in reduced hindbrain, ill-defined MHB region, and trunk abnormalities similar to Brd2a morphants, but presents unique circulatory and pronephric defects\_HsBrd2RNA control**

HsBrd2 RNA-injected embryo control:

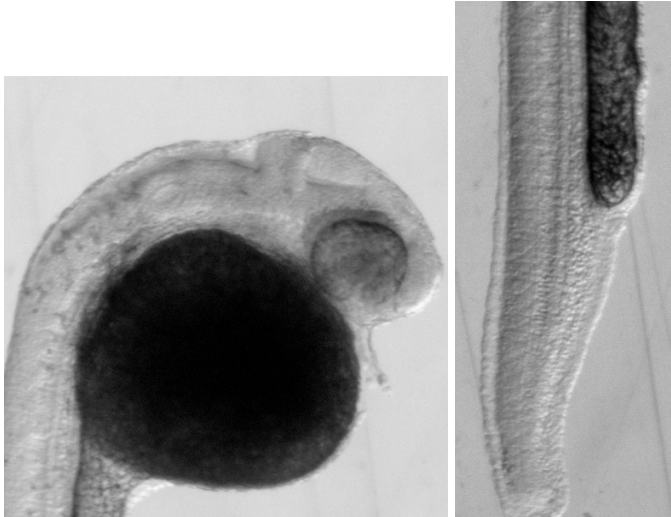

Midbrain-hindbrain boundary (MHB) region, pronephric duct cloaca, and peripheral blood island (PBI) are all normal in HsBrd2RNA-injected control embryos.

**S3. Brd2b knockdown increases cell death in the CNS of prim 5 morphant embryos but reduces cell death in the cloaca of the pronephros\_HsBrd2RNA control**

TUNEL analysis on HsBrd2RNA-injected control embryos (head and trunk)

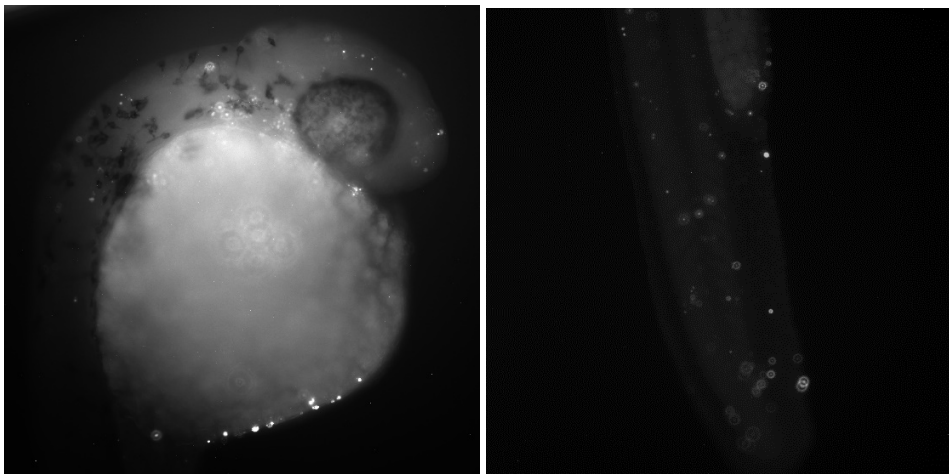

Supplement: s1 [file s1]
